# Supplementary material for: Accuracy of augmented reality-guided needle placement for pulsed radiofrequency treatment of pudendal neuralgia: a pilot study on a phantom model
Source: PeerJ. 2024 Mar 28;12:e17127. doi: 10.7717/peerj.17127 (PMC10981882; doi:10.7717/peerj.17127)
Supplement: Supplemental Information 3 [file peerj-12-17127-s003.xlsx]

## Sheet: Blad1
Subject no	Euclidean distance [mm]	Lateral distance [mm]	Depth distance [mm]
1	8.62973	3.69186	8.62475
1	5.83446	3.1512	7.16726
1	7.08592	3.78402	7.172
1	10.652	3.46904	10.6225
1	1.23881	0.0260569	1.70951
2	1.89609	1.89609	0.000730117
2	7.8724	0.829343	11.1612
2	6.50712	6.50712	0.00175631
2	6.20601	6.20601	0.00242002
2	0.896585	0.395087	1.34483
3	6.8014	3.73839	9.84198
3	5.20298	4.96446	2.83506
3	7.59042	6.04448	8.30548
3	4.31323	4.19884	1.08668
3	5.79056	5.38783	3.22934
4	4.43399	4.22904	1.39338
4	3.86341	3.86341	0.00368401
4	3.16596	0.0131297	3.93036
4	1.77473	1.77473	0.00220615
4	2.47124	0.804743	3.31691
5	10.5086	3.17507	21.1042
5	7.39786	3.18497	13.9984
5	7.19173	7.18844	0.398168
5	7.47556	3.77572	14.5203
5	7.93178	4.85072	10.5475
6	1.99983	0.0359326	4.01745
6	1.67758	0.0260969	2.04205
6	4.66994	4.66994	0.00110627
6	2.75423	2.75423	0.00294249
6	2.02444	0.700362	2.84296
7	2.00949	2.00949	0.00326624
7	3.18901	3.189	0.00201704
7	3.68794	3.41802	1.74608
7	11.6503	10.4913	6.26088
7	6.65649	6.18038	2.96949
8	1.23286	0.0344808	1.76698
8	2.00709	1.27401	1.84665
8	0.827938	0.667939	0.70428
8	3.30427	3.30427	0.00118434
8	2.01914	1.78443	1.13171
